# Supplementary material for: Layer Inoculation as a New Technology to Resist Volatile Fatty Acid Inhibition during Solid-State Anaerobic Digestion: Methane Yield Performance and Microbial Responses
Source: MDPI journal article supplement (doi:10.3390/fermentation9060535), 2023-05-31
Supplement: s1 [file s1]

## Supplementary Materials

### **Layer Inoculation as a New Technology to Resist Volatile Fatty Acid Inhibition during Solid-State Anaerobic Digestion: Methane Yield Performance and Microbial Responses**

Xingliang Gao <sup>1,†</sup>, Zhuowu Li <sup>2,†</sup>, Keqiang Zhang <sup>2,3</sup>, Dewang Kong <sup>4</sup>, Wenxuan Gao <sup>2</sup>, Junfeng Liang <sup>2,3</sup>, Fuyuan Liu <sup>1,\*</sup> and Lianzhu Du <sup>2,3,\*</sup>

1 State Key Laboratory of Sheep Genetic Improvement and Healthy Production, Xinjiang Academy of Agricultural Reclamation Sciences, 221 Wuyi Road, Shihezi 832000, China; gaoxingliang2020@outlook.com

2 Agro-Environmental Protection Institute, Ministry of Agriculture and Rural Affairs, 31 Fukang Road, Tianjin 300191, China; li2227634950@163.com (Z.L.); kqzhang68@126.com (K.Z.); wenxuanguao@hotmail.com (W.G.); liangjunfeng2008@126.com (J.L.)

3 Key Laboratory of Low-Carbon Green Agriculture in North China, Ministry of Agriculture and Rural Affairs, Beijing 100193, China

4 Hangzhou Energy and Environmental Engineering Co., Ltd., 207 East Fengqi Road, Hangzhou 310020, China; hnkongdewang@126.com

\* Correspondence: xjliufuyuan@sohu.com (F.L.); dulianzhu99@163.com (L.D.);

Tel.: +86-22-23616673 (L.D.)

**Figure S1.** Variations in SCOD and pH values during SS-AD

**Figure S2.** TAN concentration during SS-AD in reactors P, M, and L

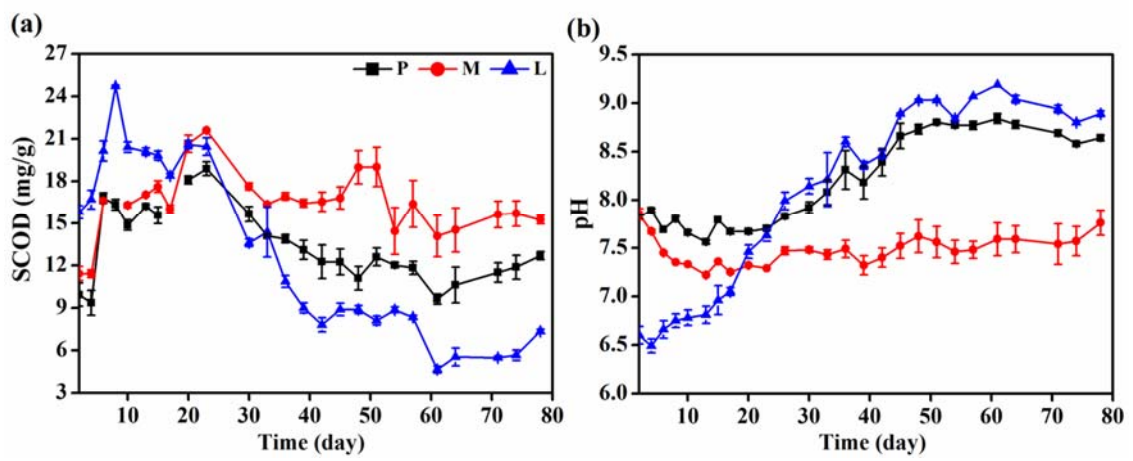

**Figure S1.** Variations in SCOD and pH values during SS-AD

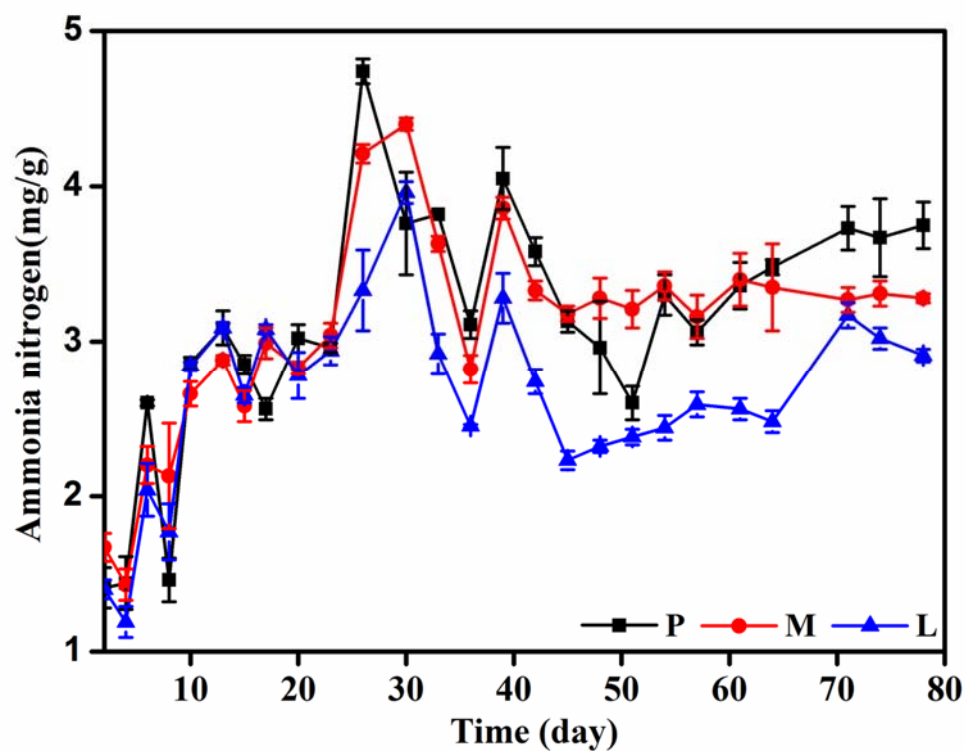

**Figure S2.** TAN concentration during SS-AD in reactors P, M, and L
